# Supplementary material for: Synthesis, intermolecular interactions and biological activities of two new organic–inorganic hybrids C6H10N2,2Br and C6H10N2,2Cl·H2O
Source: Royal Society of Chemistry journal article supplement (doi:10.1039/c9ra09294c), 2020-01-01

**Figure .**

**(A)**  $^1\text{H}$  NMR spectrum of the  $\text{C}_6\text{H}_{10}\text{N}_2, 2\text{Br}$  compound

**(B)**  $^1\text{H}$  NMR spectrum of the  $\text{C}_6\text{H}_{10}\text{N}_2, 2\text{Cl}\cdot\text{H}_2\text{O}$  compound

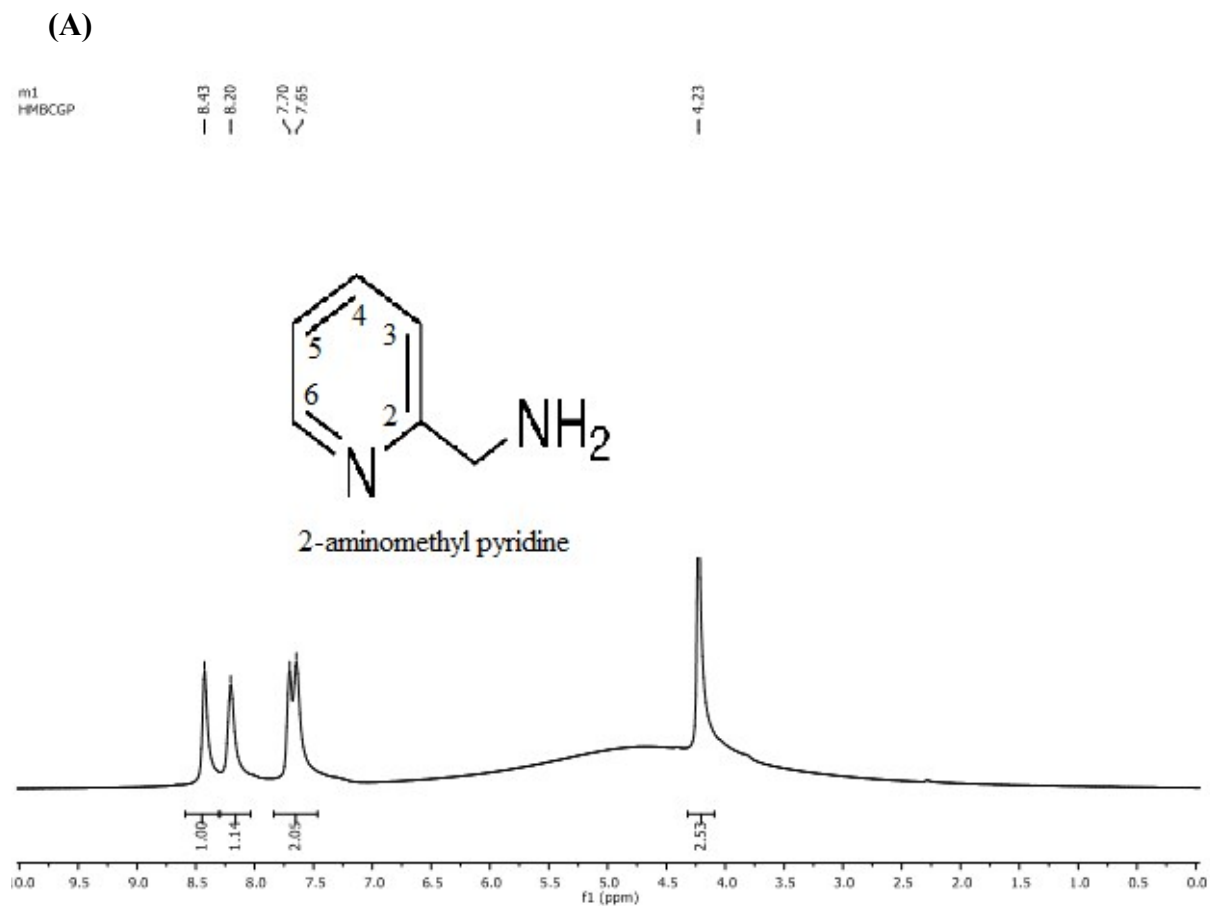

**(B)**

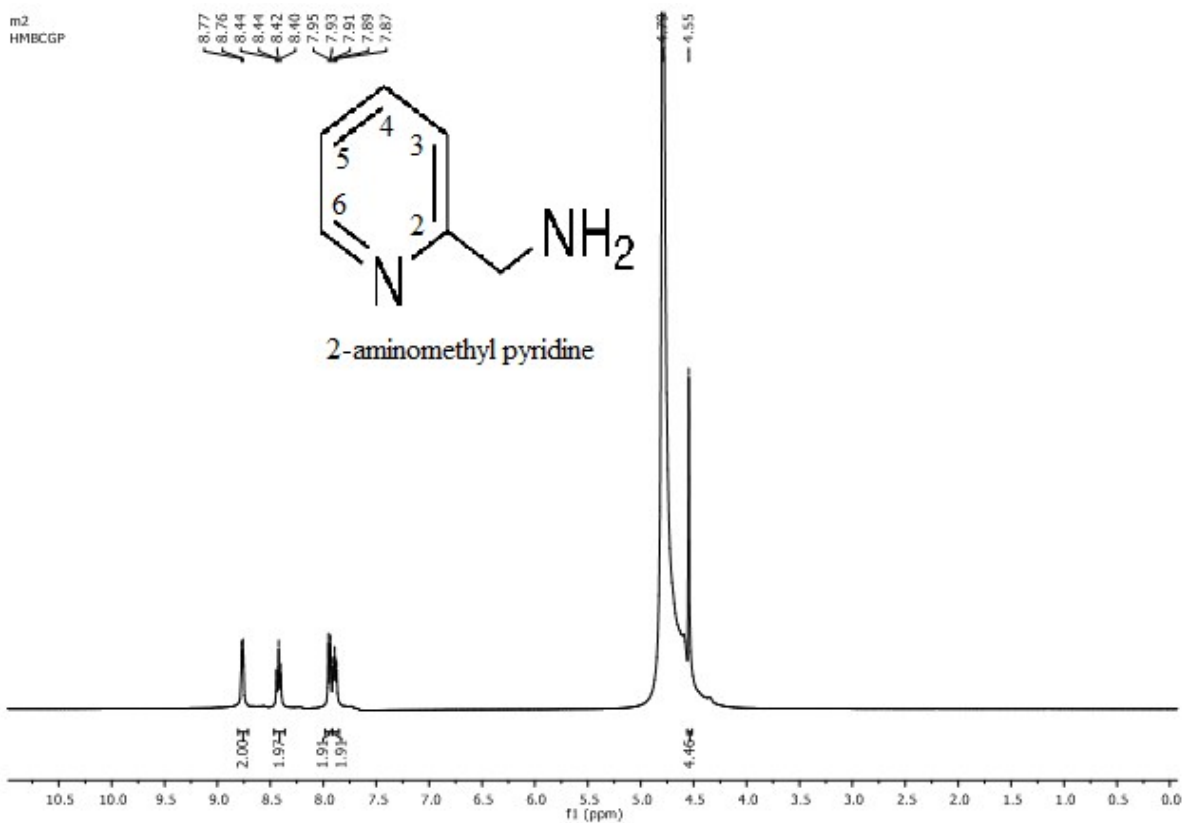

Supplement: c9ra09294c1.pdf [file c9ra09294c1.pdf]
